# Supplementary material for: Prevalence and Risk Factors for School-Associated Transmission of SARS-CoV-2
Source: PubMed Central journal article supplement (PMC10403780; doi:10.1001/jamahealthforum.2023.2310), 2023-08-04
Supplement: jamahealthforum-e232310-s003.pdf [file jamahealthforum-e232310-s003.pdf]

## Supplemental Online Content

Nelson SB, Dugdale CM, Brenner IR, et al. Prevalence and risk factors for school-associated transmission of SARS-CoV-2. *JAMA Health Forum*. 2023;4(8):e232310.  
doi:10.1001/jamahealthforum.2023.2310

**eTable 1.** K-12 Schools SARS-CoV-2 Contact Tracing Tracker, Fall 2020/Spring 2021

**eTable 2.** K-12 Schools SARS-CoV-2 Contact Tracing Tracker, Fall 2021

**eTable 3.** Index Case Characteristics and Number of Transmissions Per Index Case, Fall 2020/Spring 2021 (Univariable Analysis)

**eTable 4.** Index Case Characteristics and Number of Transmissions Per Index Case, Fall 2021 (Univariable Analysis)

**eFigure.** Vaccination Rates by Massachusetts District Over Time

This supplemental material has been provided by the authors to give readers additional information about their work.

**eTable 1 (Supplement 1) and eTable 2 (Supplement 2): Data collection instruments**

*School staff were provided with these standardized data collection instruments. All data were collected prospectively during the study periods. School personnel responsible for data collection and data entry varied by district and were chosen by district teams; most were school nurses, nursing leaders, or administrators (e.g., Assistant Principals). In some cases, school nursing teams collected data on their own forms and translated data into study forms. In all cases, study investigators provided guidance at the beginning of the study period about the type of data needed, definitions of key terms, and how to use the data collection instrument. Study investigators were also available throughout the study to clarify these elements as needed. All cases and contacts were followed up (unless noted) during the study period; as this became infeasible during the Omicron surge, the study period concludes before widespread Omicron community transmission began in MA.*

**eTable 3.** Index Case Characteristics and Number of Transmissions Per Index Case, Fall 2020/Spring 2021 (Univariable Analysis)

| Exposure                  | Index cases | Index cases with no contacts | Index cases with 1 or more contacts | Index cases with no transmissions <sup>a</sup> | Index cases with 1 or more transmissions <sup>a</sup> | Transmissions per index case <sup>b</sup> | Fisher's exact p value <sup>c</sup> |
|---------------------------|-------------|------------------------------|-------------------------------------|------------------------------------------------|-------------------------------------------------------|-------------------------------------------|-------------------------------------|
| Index case role           |             |                              |                                     |                                                |                                                       |                                           | 0.507                               |
| Staff                     | 149         | 55 (36.9%)                   | 94 (63.1%)                          | 84                                             | 10                                                    | 0.14                                      |                                     |
| Student                   | 286         | 113 (39.5%)                  | 173 (60.5%)                         | 159                                            | 14                                                    | 0.09                                      |                                     |
| Index case grade category |             |                              |                                     |                                                |                                                       |                                           | 0.65                                |
| PK/K/Elem                 | 105         | 24 (22.9%)                   | 81 (77.1%)                          | 75                                             | 6                                                     | 0.07                                      |                                     |
| MS                        | 70          | 31 (44.3%)                   | 39 (55.7%)                          | 37                                             | 2                                                     | 0.08                                      |                                     |
| HS                        | 103         | 58 (56.3%)                   | 45 (43.7%)                          | 39                                             | 6                                                     | 0.16                                      |                                     |
| Staff                     | 149         | 55 (36.9%)                   | 94 (63.1%)                          | 84                                             | 10                                                    | 0.14                                      |                                     |
| Unknown <sup>d</sup>      | 8           | 0 (0%)                       | 8 (100%)                            | 8                                              | 0                                                     | 0                                         |                                     |
| District                  |             |                              |                                     |                                                |                                                       |                                           | <0.001                              |
| District A                | 71          | 0 (0%)                       | 71 (100%)                           | 69                                             | 2                                                     | 0.03                                      |                                     |
| District B                | 10          | 0 (0%)                       | 10 (100%)                           | 3                                              | 7                                                     | 0.8                                       |                                     |
| District C                | 20          | 4 (20%)                      | 16 (80%)                            | 15                                             | 1                                                     | 0.06                                      |                                     |
| District D                | 117         | 47 (40.2%)                   | 70 (59.8%)                          | 65                                             | 5                                                     | 0.09                                      |                                     |
| District E                | 20          | 15 (75%)                     | 5 (25%)                             | 5                                              | 0                                                     | 0                                         |                                     |
| District F                | 165         | 83 (50.3%)                   | 82 (49.7%)                          | 75                                             | 7                                                     | 0.11                                      |                                     |
| District G                | 27          | 19 (70.4%)                   | 8 (29.6%)                           | 7                                              | 1                                                     | 0.25                                      |                                     |
| District H                | 5           | 0 (0%)                       | 5 (100%)                            | 4                                              | 1                                                     | 0.2                                       |                                     |
| Semester                  |             |                              |                                     |                                                |                                                       |                                           | 0.371                               |
| Fall 2020                 | 155         | 61 (39.4%)                   | 94 (60.6%)                          | 88                                             | 6                                                     | 0.07                                      |                                     |
| Spring 2021               | 277         | 107 (38.6%)                  | 170 (61.4%)                         | 152                                            | 18                                                    | 0.13                                      |                                     |

| Exposure                           | Index cases | Index cases with no contacts | Index cases with 1 or more contacts | Index cases with no transmissions <sup>a</sup> | Index cases with 1 or more transmissions <sup>a</sup> | Transmissions per index case <sup>b</sup> | Fisher's exact p value <sup>c</sup> |
|------------------------------------|-------------|------------------------------|-------------------------------------|------------------------------------------------|-------------------------------------------------------|-------------------------------------------|-------------------------------------|
| Means of identifying index case    |             |                              |                                     |                                                |                                                       |                                           | 0.32                                |
| In-school close contact            | 6           | 1 (16.7%)                    | 5 (83.3%)                           | 4                                              | 1                                                     | 0.4                                       |                                     |
| Out of school close contact        | 128         | 45 (35.2%)                   | 83 (64.8%)                          | 79                                             | 4                                                     | 0.06                                      |                                     |
| School-based asymptomatic testing  | 100         | 43 (43%)                     | 57 (57%)                            | 52                                             | 5                                                     | 0.12                                      |                                     |
| Tested because of symptoms         | 194         | 74 (38.1%)                   | 120 (61.9%)                         | 106                                            | 14                                                    | 0.12                                      |                                     |
| Tested before or after travel      | 5           | 3 (60%)                      | 2 (40%)                             | 2                                              | 0                                                     | 0                                         |                                     |
| Unknown <sup>d</sup>               | 2           | 2 (100%)                     | 0 (0%)                              | 0                                              | 0                                                     | -                                         |                                     |
| Index case number of transmissions |             |                              |                                     |                                                |                                                       |                                           | <0.001                              |
| 0                                  | 411         | 168 (40.9%)                  | 243 (59.1%)                         | 243                                            | 0                                                     | 0                                         |                                     |
| 1                                  | 19          | 0 (0%)                       | 19 (100%)                           | 0                                              | 19                                                    | 1                                         |                                     |
| 2                                  | 5           | 0 (0%)                       | 5 (100%)                            | 0                                              | 5                                                     | 2                                         |                                     |
| SVI overall quartile               |             |                              |                                     |                                                |                                                       |                                           | 0.041                               |
| 1                                  | 157         | 66 (42%)                     | 91 (58%)                            | 85                                             | 6                                                     | 0.08                                      |                                     |
| 2                                  | 103         | 19 (18.4%)                   | 84 (81.6%)                          | 80                                             | 4                                                     | 0.06                                      |                                     |
| 3                                  | 175         | 83 (47.4%)                   | 92 (52.6%)                          | 78                                             | 14                                                    | 0.18                                      |                                     |
| SVI SES quartile                   |             |                              |                                     |                                                |                                                       |                                           | <0.001                              |
| 1                                  | 213         | 51 (23.9%)                   | 162 (76.1%)                         | 153                                            | 9                                                     | 0.06                                      |                                     |
| 2                                  | 212         | 117 (55.2%)                  | 95 (44.8%)                          | 87                                             | 8                                                     | 0.12                                      |                                     |
| 3                                  | 10          | 0 (0%)                       | 10 (100%)                           | 3                                              | 7                                                     | 0.8                                       |                                     |

a. Of cases with at least one contact

b. Total number of transmissions divided by the number of index cases with 1 or more contacts

c. Comparing transmissions per index case between the rows in each section

d. All unknown or missing data are included in these supplemental tables.

**Abbreviations:** PK/K/Elem: Pre-Kindergarten, Kindergarten, and Elementary school (grades 1-5); MS: Middle school (grades 6-8); HS: High school (grades 9-12); SVI: Social Vulnerability Index; SES: Socioeconomic status; N/A: Not available.

**eTable 4.** Index Case Characteristics and Number of Transmissions Per Index Case, Fall 2021 (Univariable Analysis)

| Exposure                                    | Index cases | Index cases with no contacts | Index cases with 1 or more contacts | Index cases with no transmissions <sup>a</sup> | Index cases with 1 or more transmissions <sup>a</sup> | Transmissions per index case <sup>b</sup> | Fisher's exact p value <sup>c</sup> |
|---------------------------------------------|-------------|------------------------------|-------------------------------------|------------------------------------------------|-------------------------------------------------------|-------------------------------------------|-------------------------------------|
| Index case role                             |             |                              |                                     |                                                |                                                       |                                           | 0.322                               |
| Staff                                       | 28          | 7 (25%)                      | 21 (75%)                            | 20                                             | 1                                                     | 0.05                                      |                                     |
| Student                                     | 281         | 87 (31%)                     | 194 (69%)                           | 165                                            | 29                                                    | 0.22                                      |                                     |
| Index case grade category                   |             |                              |                                     |                                                |                                                       |                                           | 0.072                               |
| PK/K/Elem                                   | 188         | 57 (30.3%)                   | 131 (69.7%)                         | 106                                            | 25                                                    | 0.3                                       |                                     |
| MS                                          | 51          | 9 (17.6%)                    | 42 (82.4%)                          | 39                                             | 3                                                     | 0.07                                      |                                     |
| HS                                          | 39          | 18 (46.2%)                   | 21 (53.8%)                          | 20                                             | 1                                                     | 0.05                                      |                                     |
| Staff                                       | 28          | 7 (25%)                      | 21 (75%)                            | 20                                             | 1                                                     | 0.05                                      |                                     |
| Unknown <sup>d</sup>                        | 3           | 3 (100%)                     | 0 (0%)                              | 0                                              | 0                                                     | -                                         |                                     |
| District                                    |             |                              |                                     |                                                |                                                       |                                           | 0.297                               |
| District A                                  | 38          | 0 (0%)                       | 38 (100%)                           | 35                                             | 3                                                     | 0.11                                      |                                     |
| District C                                  | 70          | 3 (4.3%)                     | 67 (95.7%)                          | 54                                             | 13                                                    | 0.24                                      |                                     |
| District I                                  | 92          | 24 (26.1%)                   | 68 (73.9%)                          | 60                                             | 8                                                     | 0.15                                      |                                     |
| School A                                    | 10          | 0 (0%)                       | 10 (100%)                           | 10                                             | 0                                                     | 0                                         |                                     |
| District G                                  | 99          | 67 (67.7%)                   | 32 (32.3%)                          | 26                                             | 6                                                     | 0.44                                      |                                     |
| Means of identifying index case             |             |                              |                                     |                                                |                                                       |                                           | 0.949                               |
| In-school close contact enrolled in TTS     | 14          | 7 (50%)                      | 7 (50%)                             | 6                                              | 1                                                     | 0.14                                      |                                     |
| In-school close contact not enrolled in TTS | 7           | 6 (85.7%)                    | 1 (14.3%)                           | 1                                              | 0                                                     | 0                                         |                                     |
| Out-of-school contact                       | 74          | 23 (31.1%)                   | 51 (68.9%)                          | 43                                             | 8                                                     | 0.24                                      |                                     |
| School-based asymptomatic testing           | 80          | 34 (42.5%)                   | 46 (57.5%)                          | 39                                             | 7                                                     | 0.22                                      |                                     |
| Tested because of symptoms                  | 124         | 15 (12.1%)                   | 109 (87.9%)                         | 95                                             | 14                                                    | 0.19                                      |                                     |
| Unknown <sup>d</sup>                        | 10          | 9 (90%)                      | 1 (10%)                             | 1                                              | 0                                                     | 0                                         |                                     |
| Index case vaccination status               |             |                              |                                     |                                                |                                                       |                                           | 0.152                               |
| Fully vaccinated                            | 44          | 12 (27.3%)                   | 32 (72.7%)                          | 31                                             | 1                                                     | 0.03                                      |                                     |
| Partially vaccinated                        | 9           | 3 (33.3%)                    | 6 (66.7%)                           | 6                                              | 0                                                     | 0                                         |                                     |
| Unvaccinated                                | 245         | 69 (28.2%)                   | 176 (71.8%)                         | 147                                            | 29                                                    | 0.24                                      |                                     |
| Unknown <sup>d</sup>                        | 11          | 10 (90.9%)                   | 1 (9.1%)                            | 1                                              | 0                                                     | 0                                         |                                     |

| Exposure                           | Index cases | Index cases with no contacts | Index cases with 1 or more contacts | Index cases with no transmissions <sup>a</sup> | Index cases with 1 or more transmissions <sup>a</sup> | Transmissions per index case <sup>b</sup> | Fisher's exact p value <sup>c</sup> |
|------------------------------------|-------------|------------------------------|-------------------------------------|------------------------------------------------|-------------------------------------------------------|-------------------------------------------|-------------------------------------|
| Index case number of transmissions |             |                              |                                     |                                                |                                                       |                                           | <0.001                              |
| 0                                  | 279         | 94 (33.7%)                   | 185 (66.3%)                         | 185                                            | 0                                                     | 0                                         |                                     |
| 1                                  | 21          | 0 (0%)                       | 21 (100%)                           | 0                                              | 21                                                    | 1                                         |                                     |
| 2                                  | 6           | 0 (0%)                       | 6 (100%)                            | 0                                              | 6                                                     | 2                                         |                                     |
| 3                                  | 1           | 0 (0%)                       | 1 (100%)                            | 0                                              | 1                                                     | 3                                         |                                     |
| 4                                  | 2           | 0 (0%)                       | 2 (100%)                            | 0                                              | 2                                                     | 4                                         |                                     |
| SVI overall quartile               |             |                              |                                     |                                                |                                                       |                                           | 0.208                               |
| 1                                  | 70          | 3 (4.3%)                     | 67 (95.7%)                          | 54                                             | 13                                                    | 0.24                                      |                                     |
| 2                                  | 229         | 91 (39.7%)                   | 138 (60.3%)                         | 121                                            | 17                                                    | 0.2                                       |                                     |
| SVI SES quartile                   |             |                              |                                     |                                                |                                                       |                                           | 0.428                               |
| 1                                  | 200         | 27 (13.5%)                   | 173 (86.5%)                         | 149                                            | 24                                                    | 0.17                                      |                                     |
| 2                                  | 99          | 67 (67.7%)                   | 32 (32.3%)                          | 26                                             | 6                                                     | 0.44                                      |                                     |

- a. Of cases with at least one contact
- b. Total number of transmissions divided by the number of index cases with 1 or more contacts
- c. Comparing transmissions per index case between the rows in each section
- d. All unknown or missing data are included in these supplemental tables.

**Abbreviations:** PK/K/Elem: Pre-Kindergarten, Kindergarten, and Elementary school (grades 1-5); MS: Middle school (grades 6-8); HS: High school (grades 9-12); SVI: Social Vulnerability Index; SES: Socioeconomic status; TTS: Test-to-Stay program; N/A: Not available

**eFigure. Vaccination Rates by Massachusetts District Over Time**

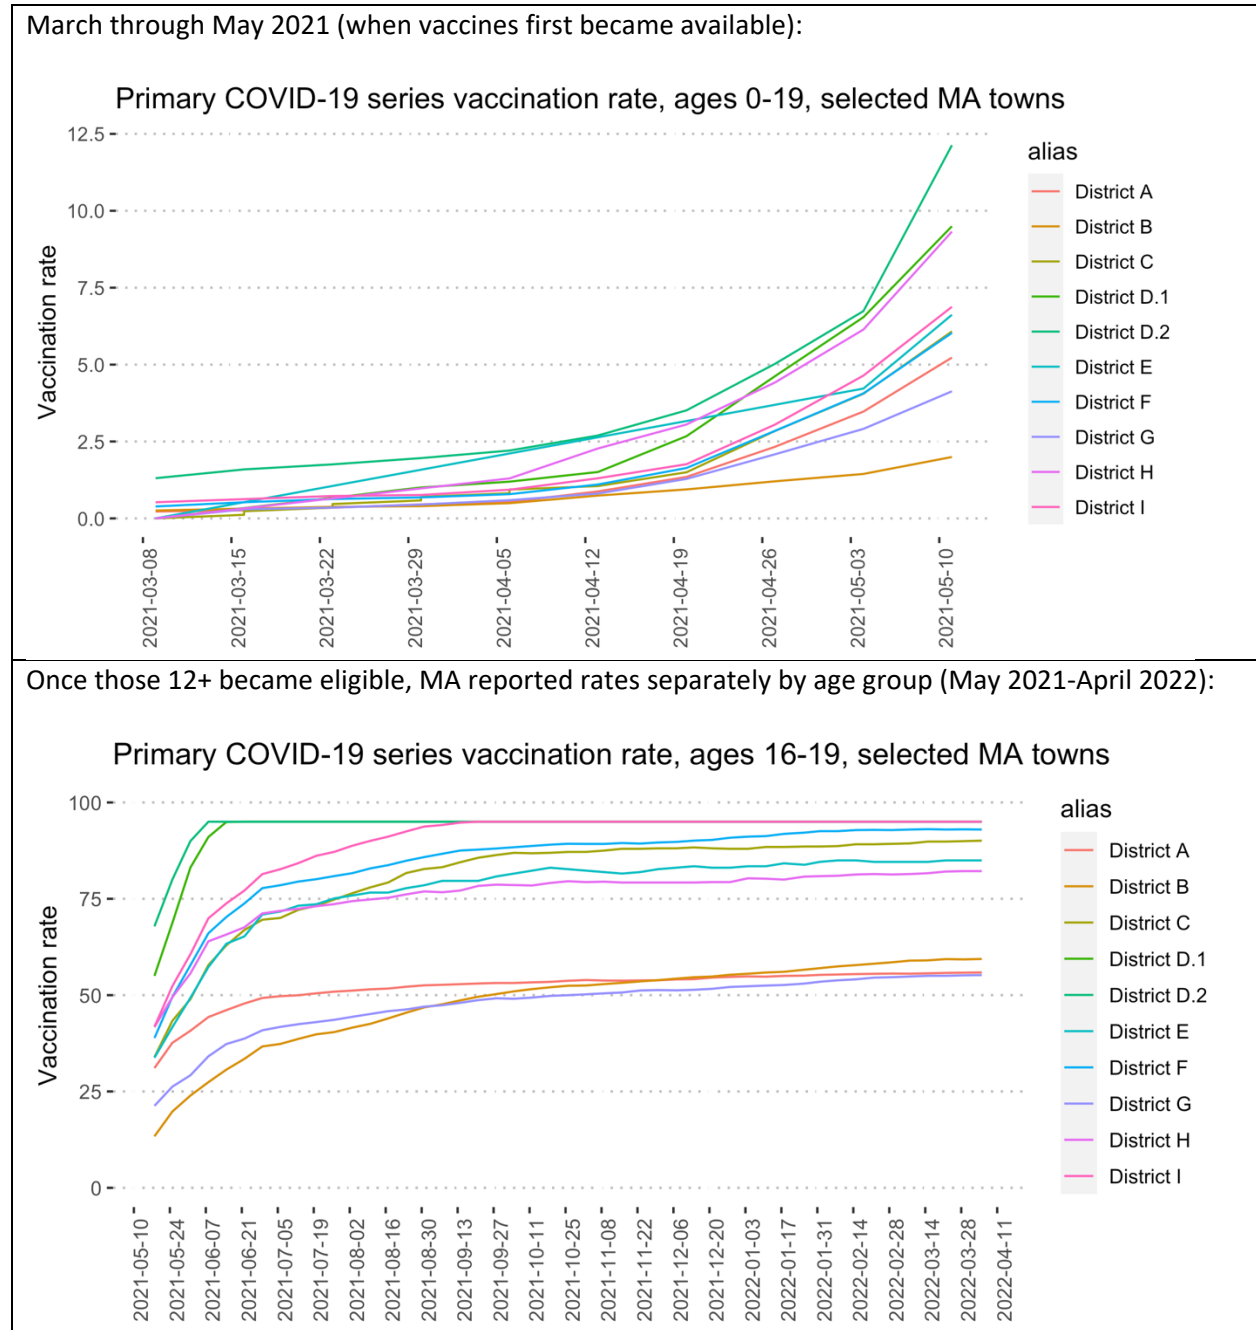

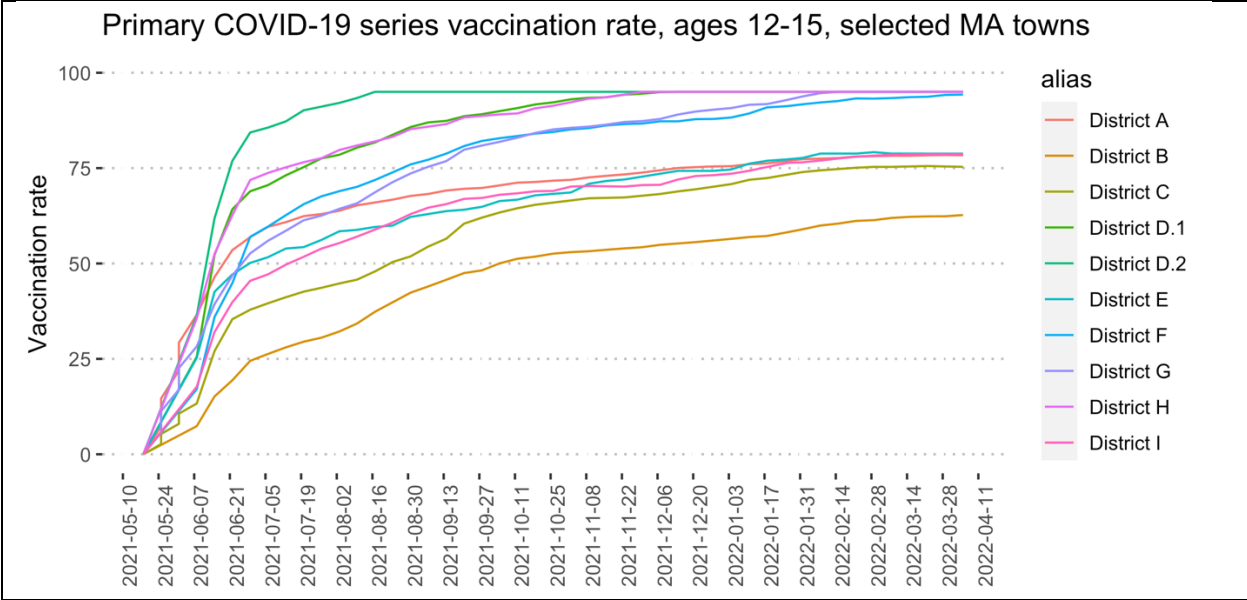

Ages 5-11 became eligible for vaccination in November 2021 (November 2021 through April 2022)

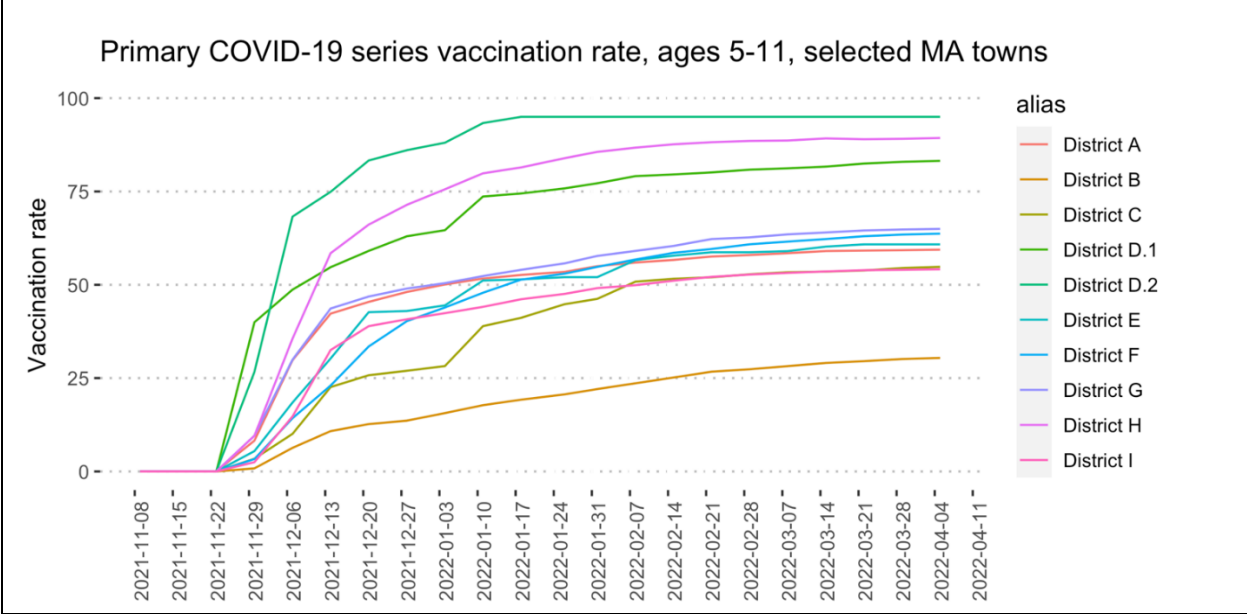

District D includes 2 towns; vaccination rates were reportedly separately for these towns.
