# Supplementary material for: Prevalence and Risk Factors for School-Associated Transmission of SARS-CoV-2
Source: PubMed Central journal article supplement (PMC10403780; doi:10.1001/jamahealthforum.2023.2310), 2023-08-04
Supplement: jamahealthforum-e232310-s004.pdf [file jamahealthforum-e232310-s004.pdf]

## Data Sharing Statement

Nelson. Prevalence and Risk Factors for School-Associated Transmission of SARS-CoV-2. *JAMA Health Forum*. Published August 04, 2023. doi:10.1001/jamahealthforum.2023.2310

### Data

**Data available:** Yes

**Data types:** Deidentified participant data

**How to access data:** Data from individual districts will be shared on reasonable request. Requests should be addressed to Dr. Andrea Ciaranello ([aciaranello@mgh.harvard.edu](mailto:aciaranello@mgh.harvard.edu))

**When available:** With publication

### Supporting Documents

**Document types:** None

### Additional Information

**Who can access the data:** Data will be made available to interested users upon successful review of data request as well as completion of any relevant data use agreements.

**Types of analyses:** Requests should articulate intended purpose.

**Mechanisms of data availability:** Data from individual districts may require data use agreements.
